# Supplementary material for: No role for industrial black carbon in forcing 19th century glacierretreat in the Alps
Source: Copernicus journal article supplement (doi:10.5194/tc-2018-22), 2018-02-20
Supplement: Supplementary file 2 [file tc-2018-22-supplement.pdf]

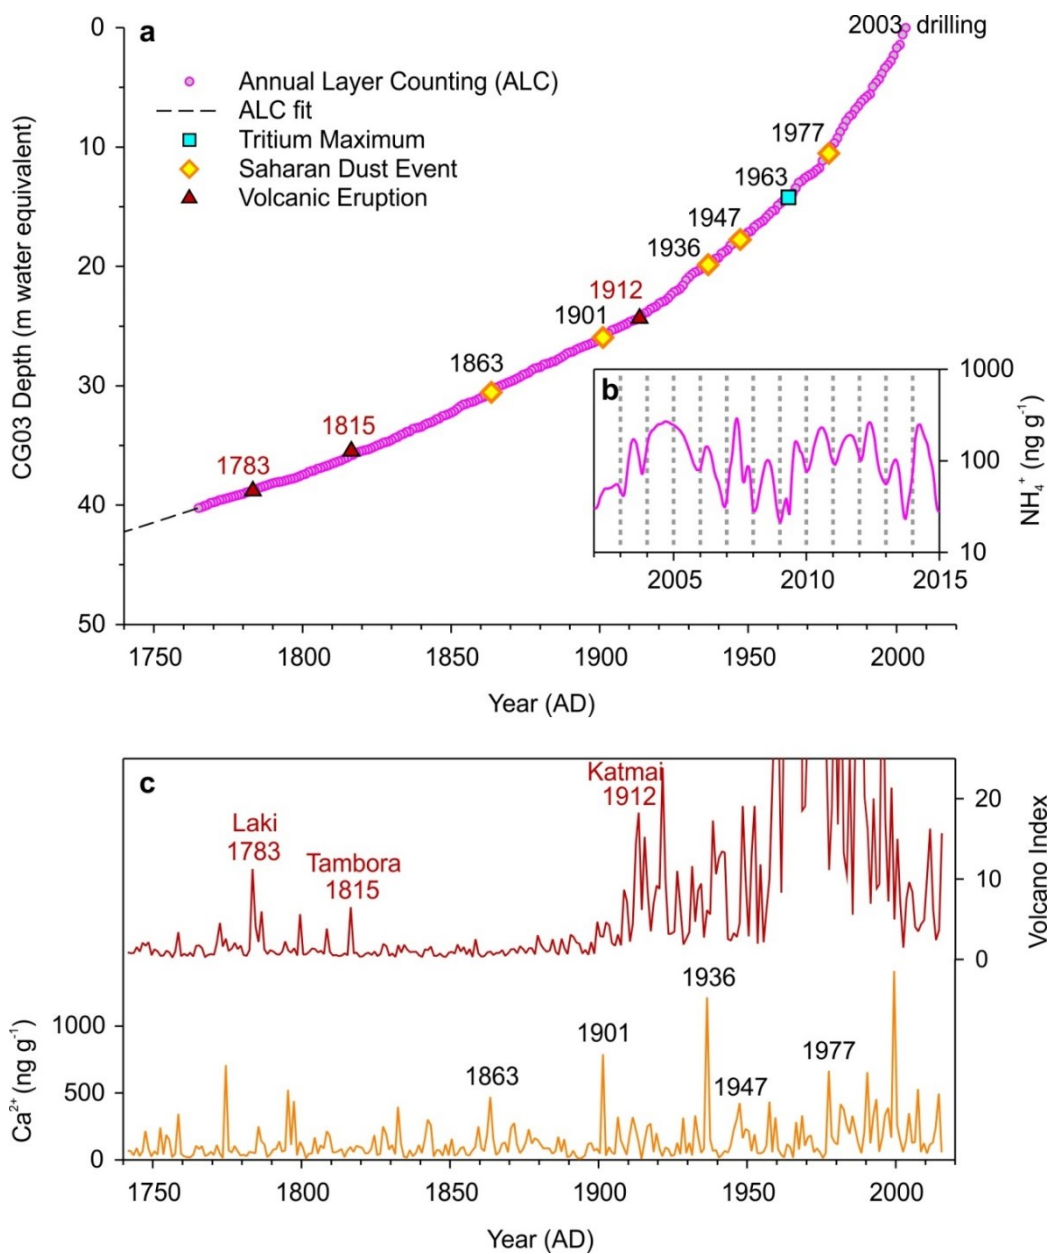

5 **Supplementary Fig. S1:** Colle Gnifetti timescale **a)** Depth-age relationship for CG03 based on combining annual-layer counting with distinctive reference horizons (Jenk et al., 2009); **b)** CG15  $\text{NH}_4^+$  concentrations used for extending the chronology into the present. **c)** Volcano Index (defined as  $\text{Volcano Index} = [\text{SO}_4^{2-}]^2/[\text{Ca}^{2+}]$ ) and  $\text{Ca}^{2+}$  concentrations used to identify volcanic eruptions and historic Saharan dust events (Wagenbach et al., 1996; Oeschger et al., 1977).

**Supplementary Table S1:** Age markers for the Colle Gnifetti ice cores.

| Type of Age Marker | Parameter                                                                       | Year (AD) | CG03A Depth (m) | CG03B Depth (m) |
|--------------------|---------------------------------------------------------------------------------|-----------|-----------------|-----------------|
| SDE 1977           | Ca <sup>2+</sup> , Fe                                                           | 1977      | 18.90           | 18.88           |
| NWT                | <sup>3</sup> H                                                                  | 1963      | 24.45           | n.a.            |
| SDE 1947           | Ca <sup>2+</sup> , Fe                                                           | 1947      | 29.23           | 29.32           |
| SDE 1936           | Ca <sup>2+</sup> , Fe                                                           | 1936      | 31.96           | 32.03           |
| Katmai 1912        | SO <sub>4</sub> <sup>2-</sup> , SO <sub>4</sub> <sup>2-</sup> /Ca <sup>2+</sup> | 1912      | 37.31           | 37.44           |
| SDE 1901           | Ca <sup>2+</sup> , Fe                                                           | 1901      | 39.20           | 39.28           |
| SDE 1863           | Ca <sup>2+</sup> , Fe                                                           | 1863      | 44.36           | 44.46           |
| Tambora 1815       | SO <sub>4</sub> <sup>2-</sup> , SO <sub>4</sub> <sup>2-</sup> /Ca <sup>2+</sup> | 1816      | 49.79           | 49.79           |
| Laki 1783          | SO <sub>4</sub> <sup>2-</sup> , SO <sub>4</sub> <sup>2-</sup> /Ca <sup>2+</sup> | 1783      | 53.50           | 53.42           |
| Bedrock            |                                                                                 | -17000    | 80.18           | 81.14           |

SDE = Historic Saharan Dust Event (Wagenbach et al., 1996; Oeschger et al., 1977); NWT = Maximum of northern hemisphere nuclear weapon testing; n.a. = not analyzed

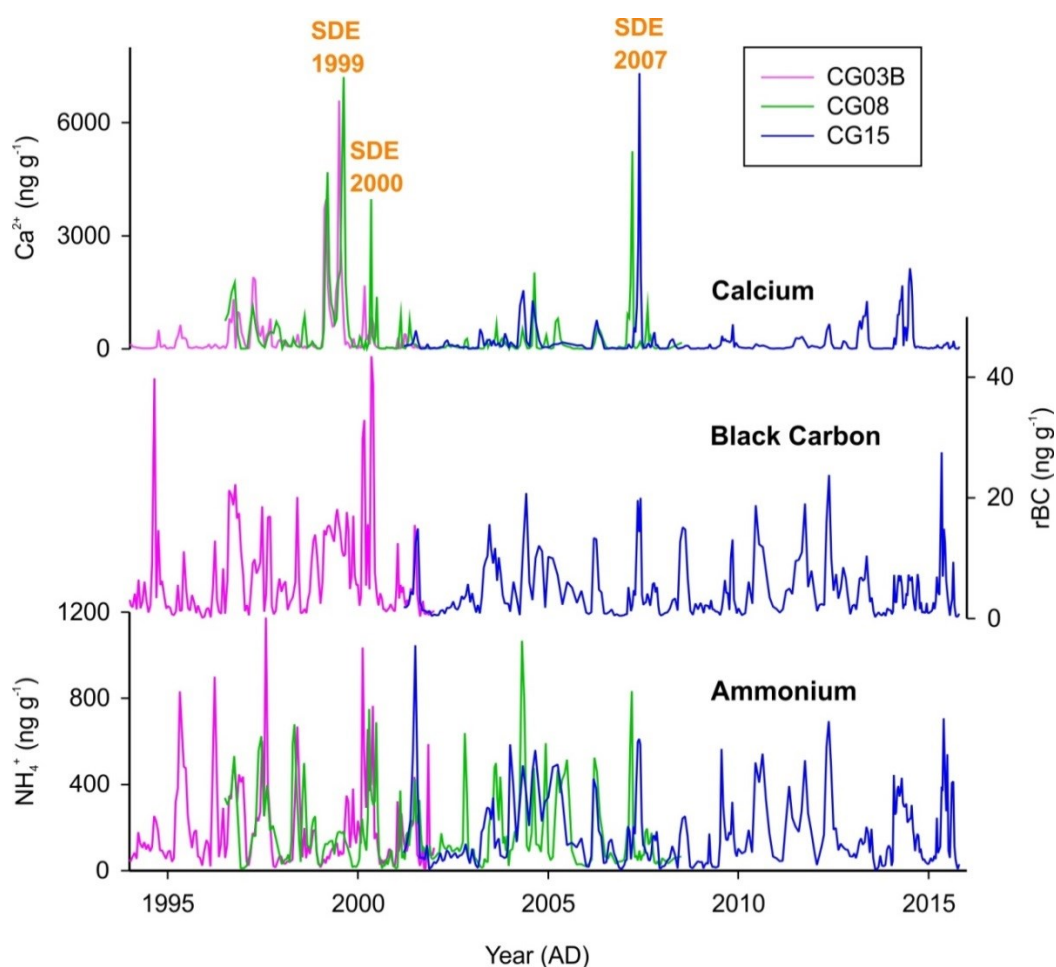

5

**Supplementary Fig. S2:** Comparison of selected tracers for the three ice/firn cores CG03B, CG08 and CG15. CG03B was dated by synchronization with CG03A, whereas CG08 and CG15 were dated by counting annual layers.

10

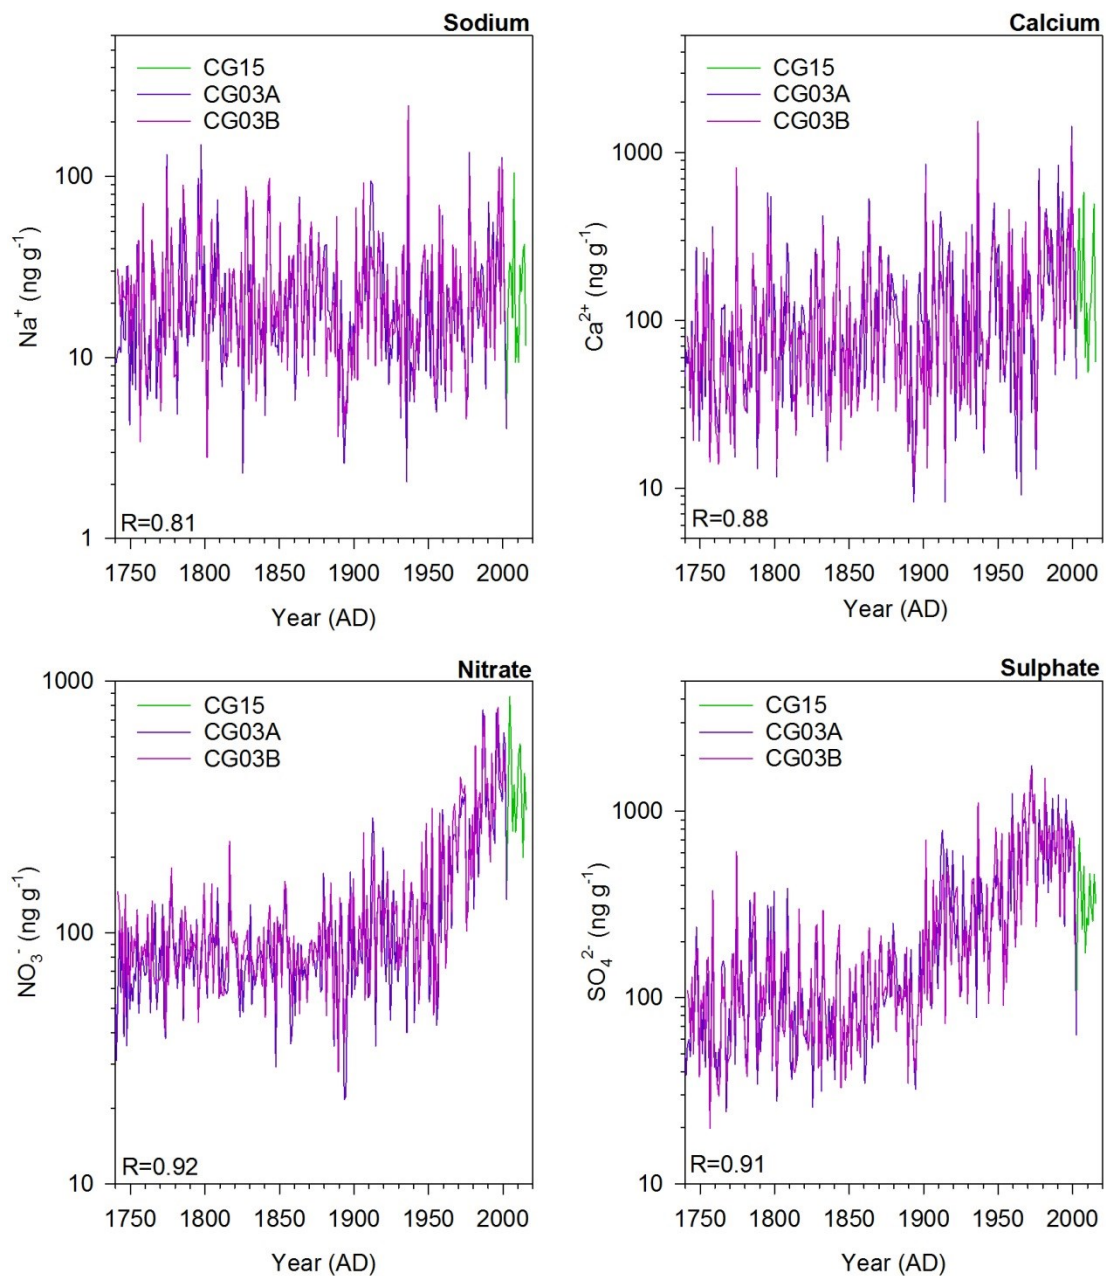

**Supplementary Fig. S3:** Annual concentrations of selected tracers for the new ice core CG15 and the two parallel cores CG03A and CG03B (1741-2015 AD) with Pearson's correlation coefficient (R) indicated.

5

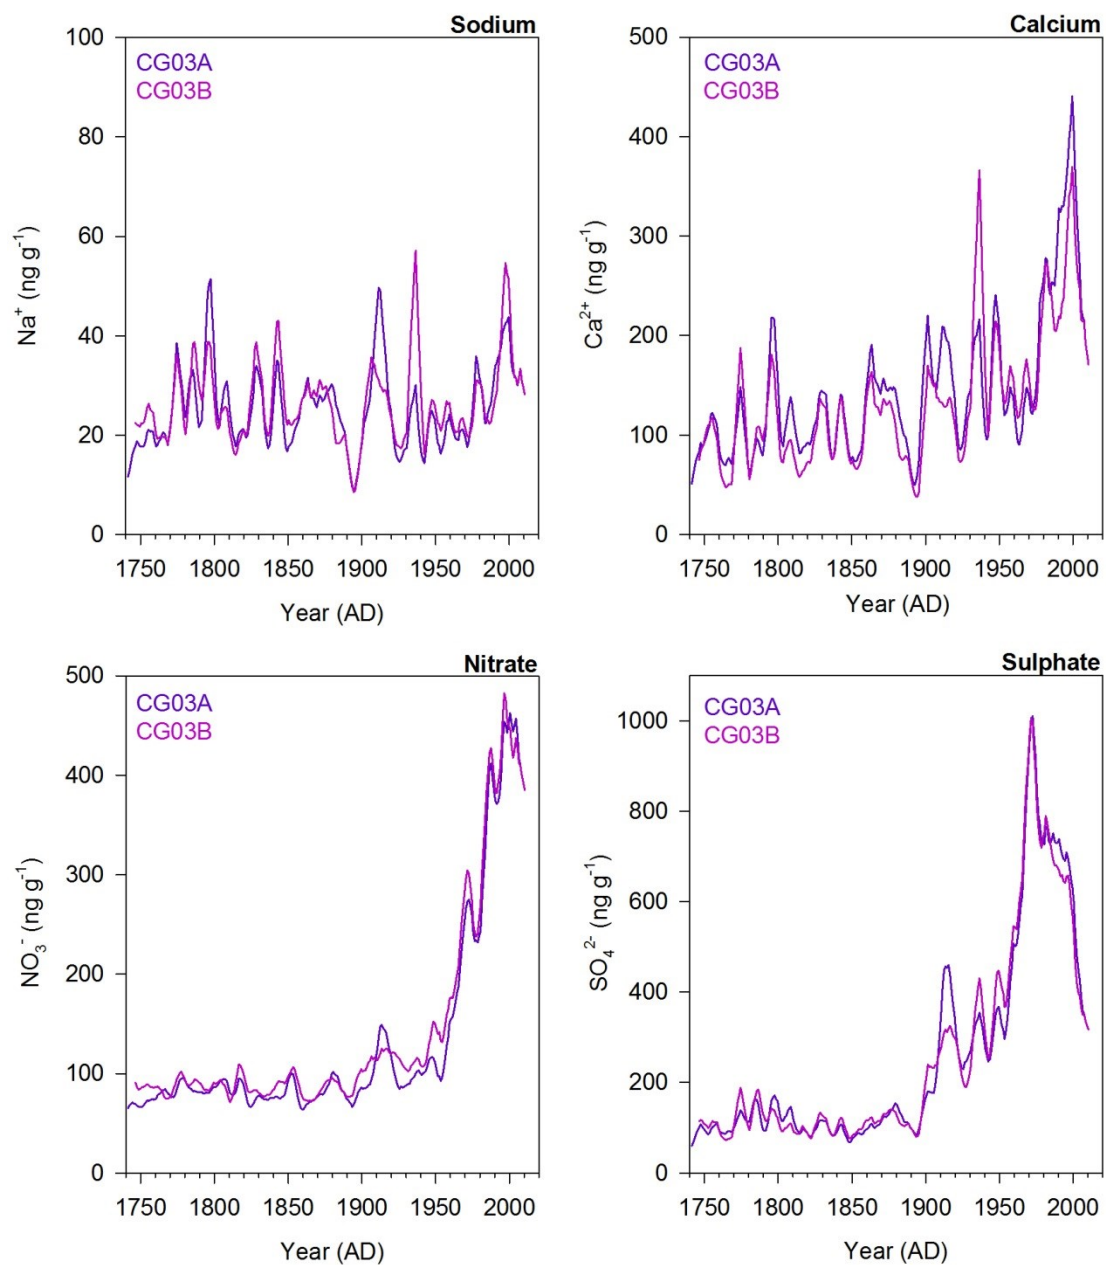

**Supplementary Fig. S4:** Concentrations of selected tracers for the two parallel cores CG03A and CG03B (1741-2002 AD) extended using CG15 (2003-2014 AD). All records were smoothed with an 11-year filter.

5

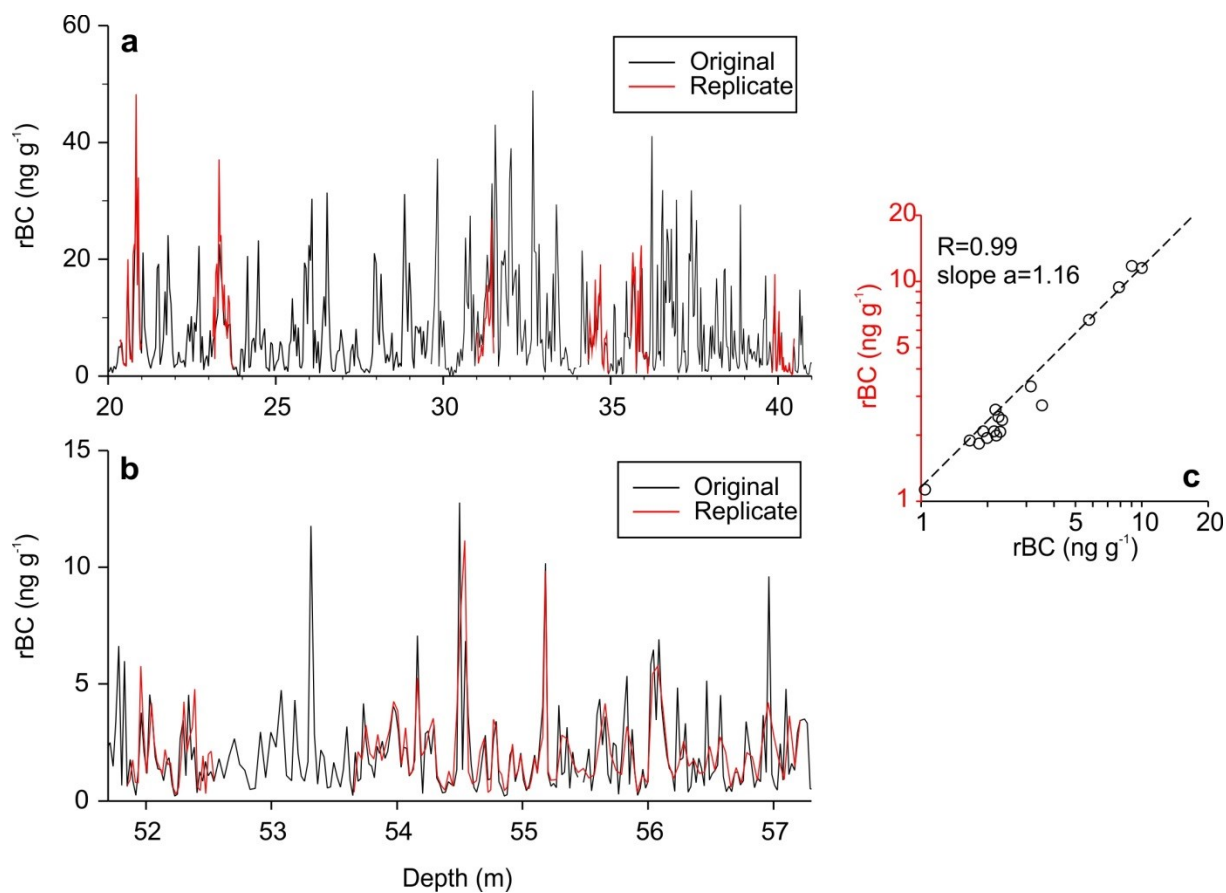

**Supplementary Fig. S5: a)** Comparison of original analyses and replicate analyses for CG03 **a)** during the industrial period (1888-1975 AD) and **b)** during the preindustrial period (1740-1799 AD).  
 5 **c)** mean concentrations determined for all ice-core sections with available replication samples with a linear fit against mean values from the original analysis.

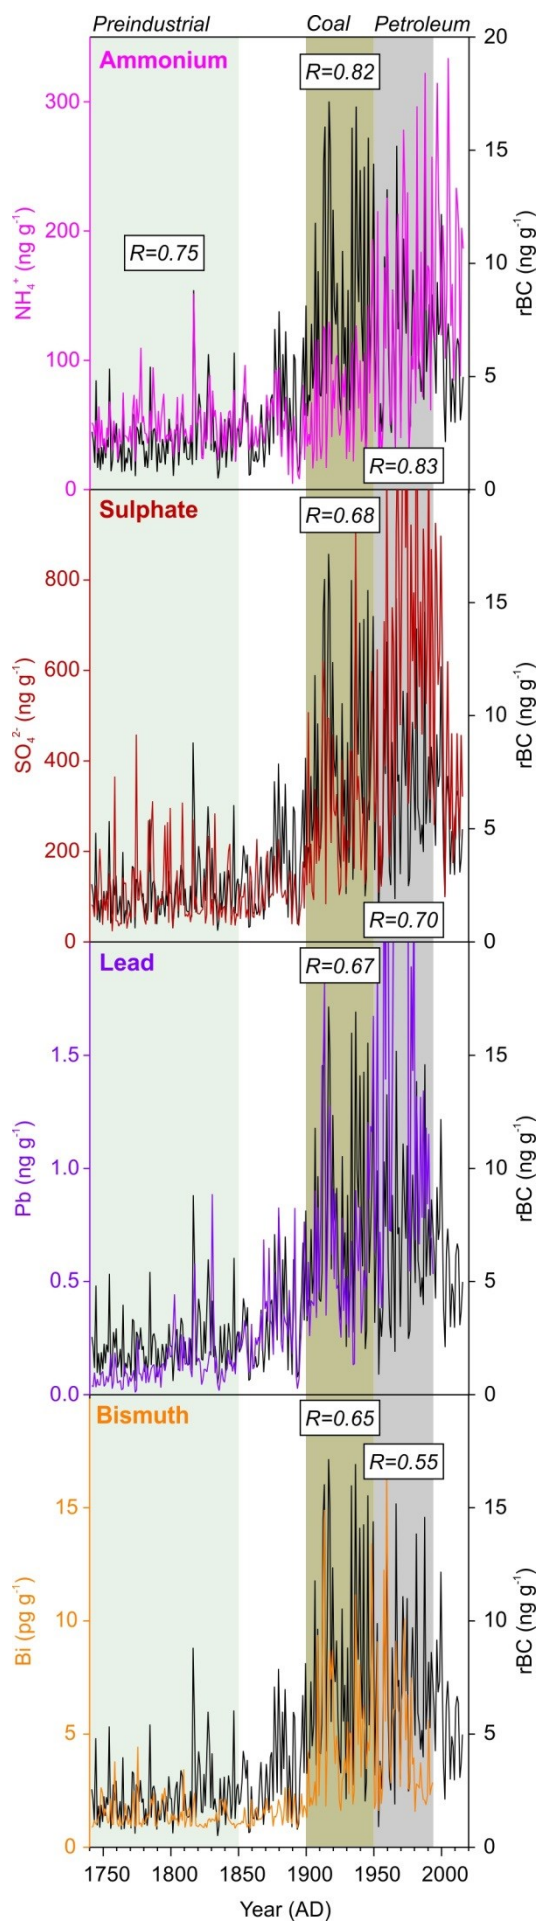

**Supplementary Fig. S6:** Colle Gnifetti rBC record compared with selected glaciochemical and trace element records. *Pearson's* correlation coefficients ( $P < 0.0001$ ; 1-sided) are displayed for time periods dominated by preindustrial emissions (1741-1850 AD), coal burning (1901-1950 AD) and burning of petroleum products emissions (1951-1993 AD), respectively.

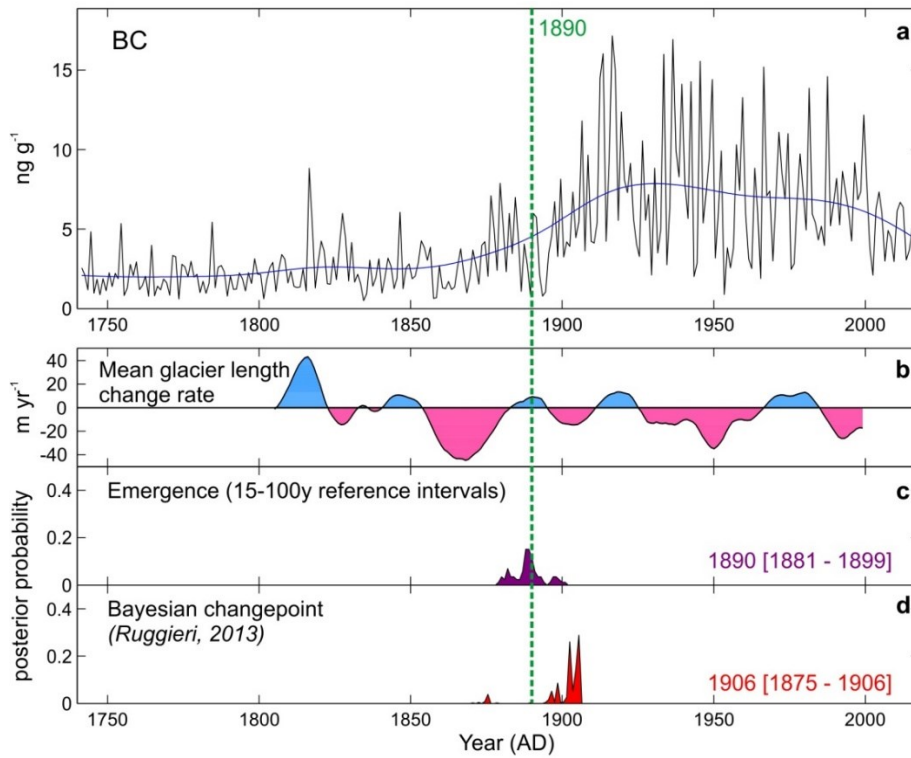

Supplementary Fig. S7: As Fig. 7 but for total BC concentrations

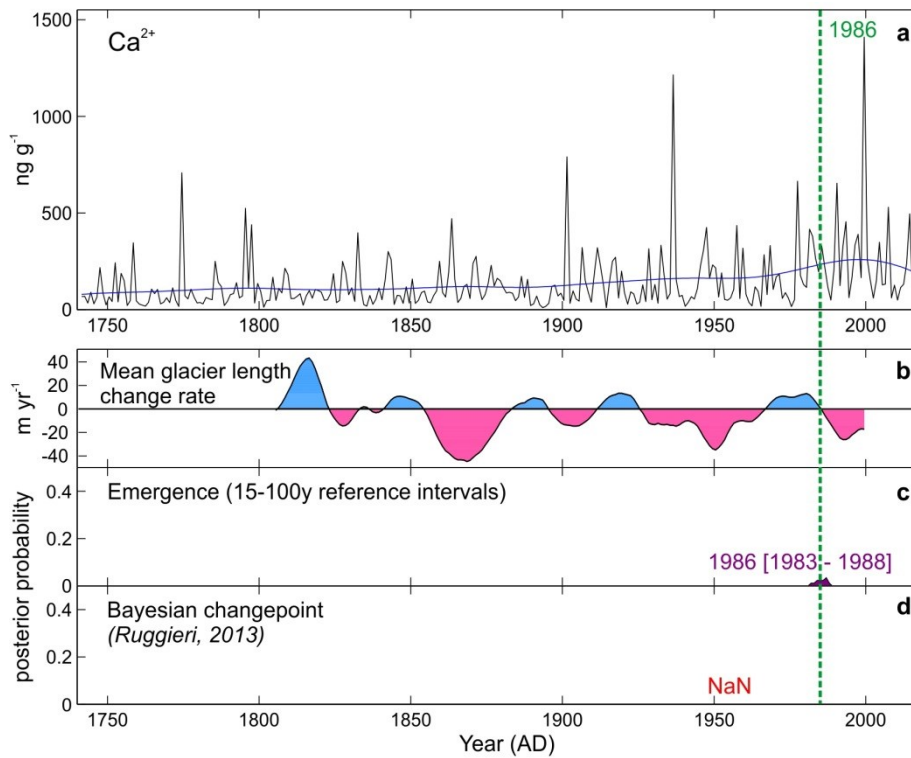

5 Supplementary Fig. S8: As Fig. 7 but for total  $\text{Ca}^{2+}$  concentrations

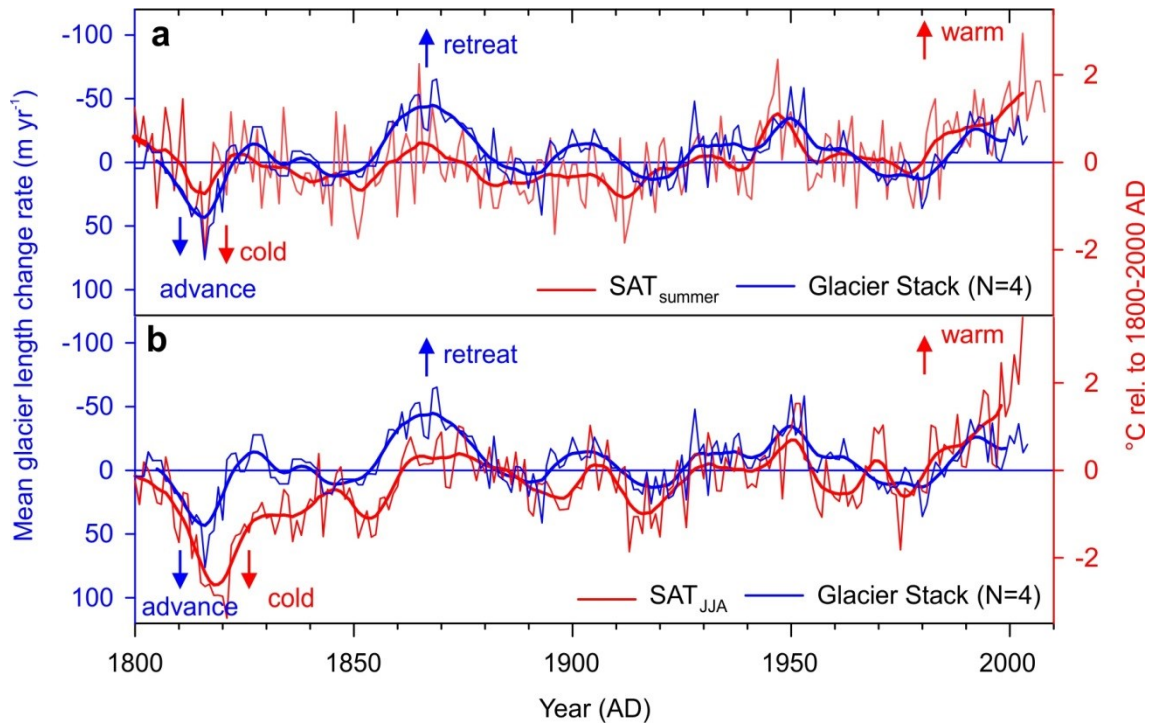

5 **Supplementary Fig. S9: a)** Smoothed and annual resolution mean glacier length change rates of the *Glacier Stack* and equally resolved surface air temperature anomalies for the summer half year ( $SAT_{summer}$ ) from the Greater Alpine Region HISTALP station network (Böhm et al., 2010); note that the curves are displayed inverse compared to Fig. 8; **b)** the same *Glacier Stack* curves compared with a June-August surface air temperature reconstruction for the greater Alpine region based on tree-rings (Büntgen et al., 2011).

10 **Supplementary References:**

Büntgen, U., Tegel, W., Nicolussi, K., McCormick, M., Frank, D., Trouet, V., Kaplan, J. O., Herzig, F., Heussner, K. U., Wanner, H., Luterbacher, J., and Esper, J.: 2500 Years of European Climate Variability and Human Susceptibility, *Science*, 331, 578-582, 2011.
